# Supplementary material for: Serum hepcidin levels in multiple sclerosis
Source: PubMed Central journal article supplement — Mult Scler J Exp Transl Clin. 2019 Nov 4;5(4):2055217319885984. doi: 10.1177/2055217319885984 (PMC6831977; doi:10.1177/2055217319885984), 2019-11-04
Supplement: MSO885984_Supplemetal_Material.pdf [file MSO885984_Supplemetal_Material.pdf]

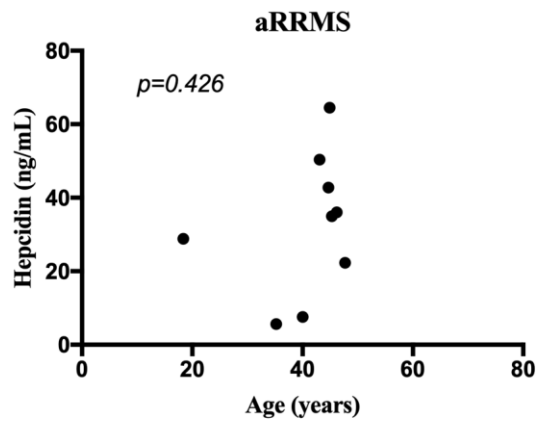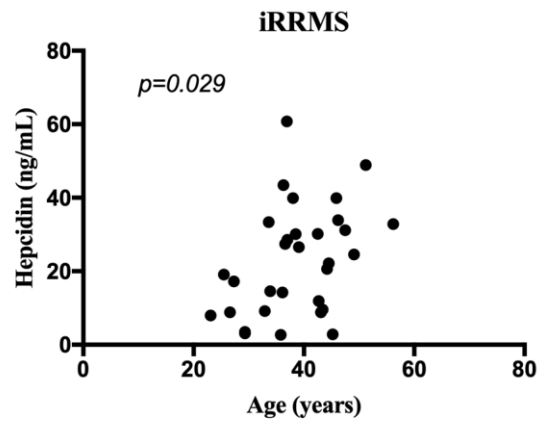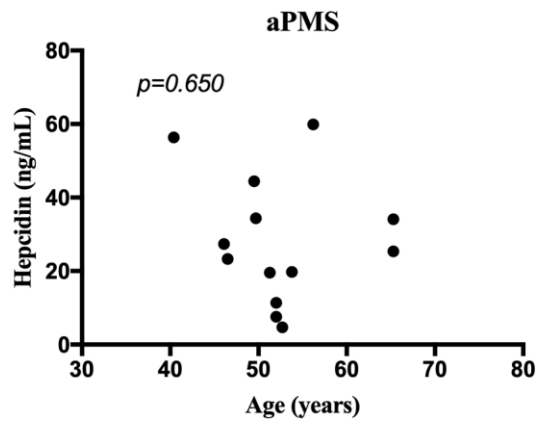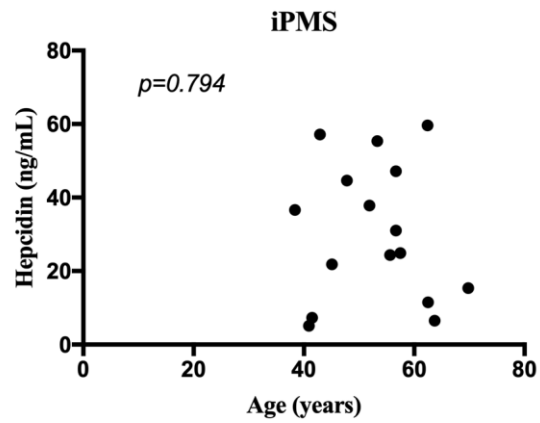

Supplemental Figure 1.

**Supplemental Table 1. Comparison of parameters of iron metabolism in MS patients regarding relapse, EDSS and DMT.**

|                                          | Relapse                  |                          |                      | EDSS   |                      | DMT                      |                          |                      |
|------------------------------------------|--------------------------|--------------------------|----------------------|--------|----------------------|--------------------------|--------------------------|----------------------|
|                                          | No relapse<br>(n=59)     | Relapse<br>(n=12)        | p-value <sup>3</sup> | r      | p-value <sup>2</sup> | No DMT<br>(n=35)         | DMT<br>(n=36)            | p-value <sup>3</sup> |
| Hepcidin<br>(ng/mL) <sup>1</sup>         | 29.5 (22.2 –<br>36.8)    | 25.1 (19.2 –<br>30.9)    | 1.000<br>(0.713)     | 0.024  | 1.000<br>(0.864)     | 27.0 (21.1 – 33.0)       | 27.1 (21.2 –<br>32.9)    | 1.000 (0.880)        |
| Iron (µmol/L) <sup>1</sup>               | 14.6 (12.1 –<br>17.1)    | 16.5 (13.8 –<br>19.2)    | 1.000<br>(0.289)     | -0.024 | 1.000<br>(0.860)     | 15.7 (13.5 – 17.4)       | 14.9 (13.1 –<br>16.8)    | 1.000 (0.675)        |
| Ferritin<br>(µg/L) <sup>1</sup>          | 124.0 (64.9 –<br>183.2)  | 92.5 (51.0 –<br>134.0)   | 1.000<br>(0.738)     | 0.217  | 0.999<br>(0.111)     | 86.0 (59.9 –<br>112.0)   | 133.5 (79.9 –<br>187.1)  | 0.621 (0.069)        |
| Transferrin<br>(mg/L) <sup>1</sup>       | 244.3 (226.5 –<br>262.0) | 275.6 (257.0 –<br>294.2) | 1.000<br>(0.202)     | -0.212 | 1.000<br>(0.120)     | 268.8 (254.1 –<br>283.5) | 259.1 (241.6 –<br>276.5) | 1.000 (0.523)        |
| TFS (%) <sup>1</sup>                     | 24.5 (20.2 –<br>28.8)    | 24.4 (20.3 –<br>28.6)    | 1.000<br>(0.638)     | 0.078  | 1.000<br>(0.572)     | 23.9 (20.5 – 27.2)       | 23.8 (20.5 –<br>27.2)    | 1.000 (0.982)        |
| sTfR (mg/L) <sup>1</sup>                 | 2.9 (2.6 –<br>3.2)       | 2.6 (2.2 –<br>2.9)       | 1.000<br>(0.129)     | 0.046  | 1.000<br>(0.739)     | 2.9 (2.6 – 3.2)          | 2.5 (2.3 – 2.8)          | 0.999 (0.111)        |
| Hepcidin-<br>Ferritin-Ratio <sup>1</sup> | 0.33 (0.24 –<br>0.41)    | 0.41 (0.32 –<br>0.51)    | 1.000<br>(0.588)     | -0.257 | 0.567<br>(0.063)     | 0.41 (0.34 – 0.49)       | 0.30 (0.24 –<br>0.36)    | 0.072 (0.008)        |
| Hepcidin-TFS-<br>Ratio <sup>1</sup>      | 1.24 (0.94 –<br>1.53)    | 1.10 (0.83 –<br>1.38)    | 1.000<br>(0.677)     | -0.015 | 1.000<br>(0.916)     | 1.18 (0.94 – 1.41)       | 1.15 (0.89 –<br>1.40)    | 1.000 (0.721)        |
| Hepcidin-TfR-<br>Ratio <sup>1</sup>      | 11.3 (8.3 –<br>14.3)     | 11.2 (8.2 –<br>14.2)     | 1.000<br>(0.653)     | 0.003  | 1.000<br>(0.983)     | 11.5 (8.0 – 15.1)        | 11.8 (9.2 – 14.4)        | 1.000 (0.990)        |

<sup>1</sup>mean and 95% confidence intervals. r = correlation coefficient.

MS: multiple sclerosis. EDSS: expanded disability status scale. DMT: disease modifying treatment. sTfR: soluble transferrin receptor. TFS: transferrin saturation. <sup>2</sup>p-values calculated by linear-regression models (fixed effects: study group, sex and age), corrected for multiple testing (Bonferroni) with uncorrected p-values in brackets. <sup>3</sup>p-values calculated by Pearson test, corrected for multiple testing (Bonferroni) with uncorrected p-values in brackets
